# Supplementary material
Source: Springer Nature journal article supplement (https://www.springermedizin.de/resource/supplementary/12889_2010_3245_MOESM1_ESM.pdf/9488480)
Supplement: MOESM1 [file 9488480]

Process groups [2] ➤

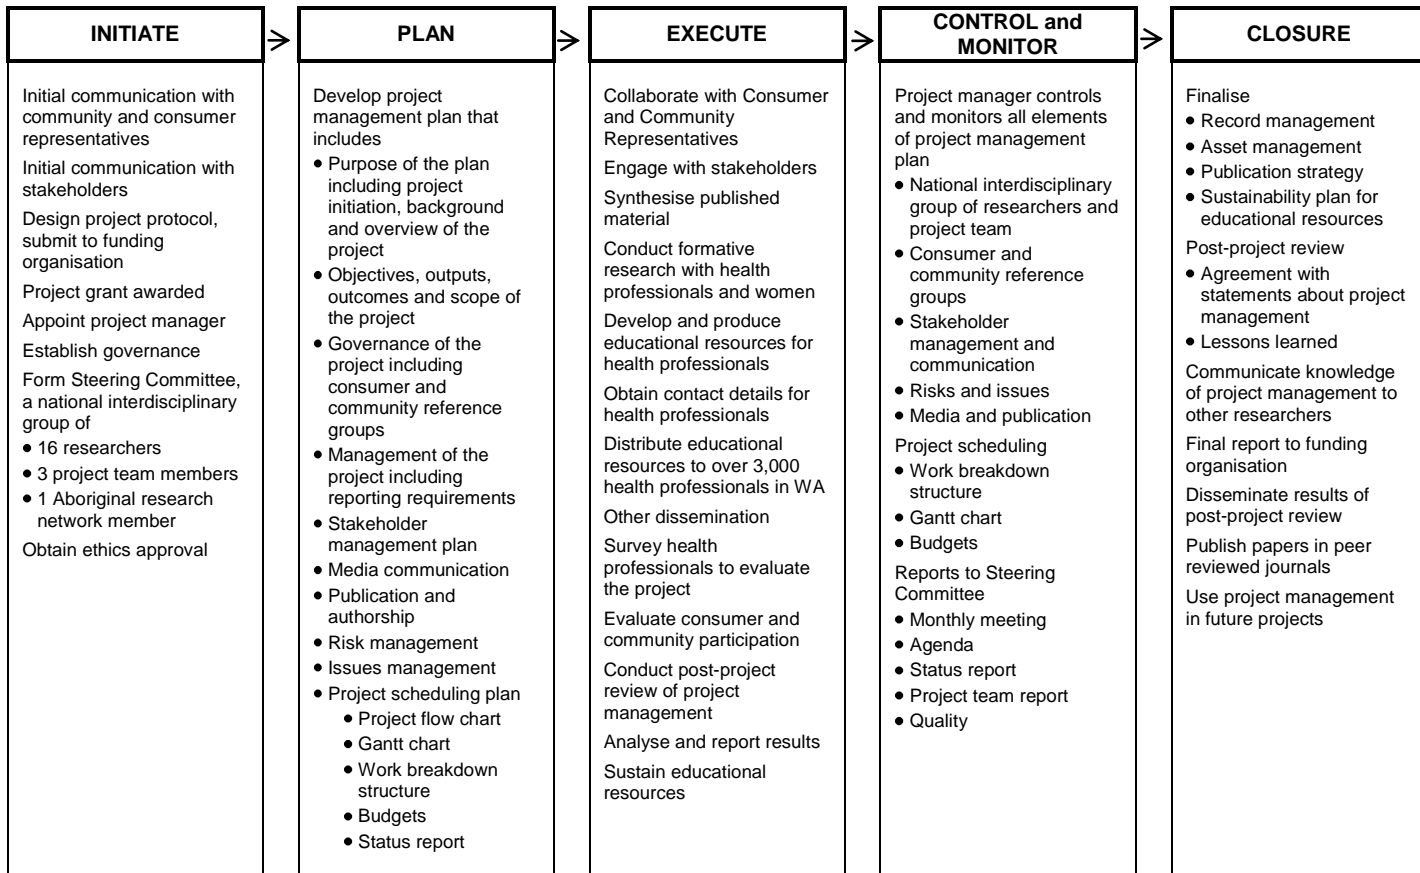

Knowledge areas [2] ➤

Integration, scope, time, cost, quality, resources, communication, risk, procurement

**Project life cycle**
